1 **Estrogen and Soy Isoflavonoids Decrease Sensitivity of Medulloblastoma and Central**  
2 **Nervous System Primitive Neuroectodermal Tumor Cells to Chemotherapeutic**  
3 **Cytotoxicity**

4

5

6 Scott M. Belcher<sup>1,2,3,4\*</sup>, Caleb C. Burton<sup>3</sup>, Clifford J. Cookman<sup>4</sup>, Michelle Kirby<sup>2</sup>, Gabriel L.  
7 Miranda<sup>3</sup>, Fatima Saeed<sup>5</sup>, and Kathleen E. Wray<sup>3</sup>

8

9 <sup>1</sup> Department of Biological Science, North Carolina State University, Raleigh, NC, United States  
10 of America

11 <sup>2</sup> Department of Pharmacology and Cell Biophysics, University of Cincinnati, Cincinnati, OH,  
12 United States of America

13 <sup>3</sup> Department of Pharmacology and Cell Biophysics, Summer Undergraduate Research Program  
14 University of Cincinnati, Cincinnati, OH, United States of America

15 <sup>4</sup> Department of Pharmacology and Cell Biophysics, Molecular, Cellular and Biochemical  
16 Pharmacology PhD Graduate Program, University of Cincinnati, Cincinnati, OH, United States  
17 of America

18 <sup>5</sup> Department of Pharmacology and Cell Biophysics, Molecular, Cellular and Biochemical  
19 Pharmacology Masters in Safety Pharmacology Training Program, University of Cincinnati,  
20 Cincinnati, OH, United States of America

21

22 \* Corresponding Author

23 Email: [smbelch2@ncsu.edu](mailto:smbelch2@ncsu.edu)

24 **Abstract**

25 **Background:** Our previous studies demonstrated that growth and migration of medulloblastoma  
26 (MB), the most common malignant brain tumor in children, are stimulated by 17 $\beta$ -estradiol. The  
27 growth stimulating effects of estrogens are mediated through ER $\beta$  and insulin-like growth factor  
28 1 signaling to inhibit caspase 3 activity and reduce tumor cell apoptosis. The objective of this  
29 study was to determine whether estrogens decreased sensitivity of MB cells to cytotoxic actions  
30 of chemotherapeutic drugs.

31 **Methods:** Using *in vitro* cell viability and clonogenic survival assays, concentration response  
32 analysis was used to determine whether the cytoprotective effects of estradiol protected human  
33 D283 Med MB cells from the cytotoxic actions of the MB chemotherapeutic drugs cisplatin,  
34 vincristine, or lomustine. Additional experiments were done to determine whether the ER  
35 antagonist fulvestrant or the selective ER modulator tamoxifen blocked the cytoprotective  
36 actions of estradiol. ER-selective agonists and antagonists were used to define receptor  
37 specificity, and the impacts of the soy-derived phytoestrogens genistein, daidzein, and s-equol on  
38 chemosensitivity were evaluated.

39 **Results:** In D283 Med cells the presence of 10 nM estradiol increased the IC<sub>50</sub> for  
40 cisplatin-induced inhibition of viability 2-fold from ~5  $\mu$ M to >10  $\mu$ M. In clonogenic survival  
41 assays estradiol decreased the chemosensitivity of D283 Med exposed to cisplatin, lomustine and  
42 vincristine. The ER $\beta$  selective agonist DPN and low physiological concentrations of the  
43 soy-derived phytoestrogens genistein, daidzein, and s-equol also decreased sensitivity of D283  
44 Med cells to cisplatin. The protective effects of estradiol were blocked by the antiestrogens  
45 4-hydroxytamoxifen, fulvestrant (ICI 182,780) and the ER $\beta$  selective antagonist PPHTP.

46 Whereas estradiol also decreased chemosensitivity of PFSK1 cells, estradiol increased sensitivity  
47 of Daoy cell to cisplatin, suggesting that ER $\beta$  mediated effects may vary in different subtypes of  
48 MB.

49 **Conclusions:** These findings demonstrate that E2 and environmental estrogens decrease  
50 sensitivity of MB to cytotoxic chemotherapeutics, and that ER $\beta$  selective and non-selective  
51 inhibition of estrogen receptor activity blocks these cytoprotective actions. These findings  
52 support the therapeutic potential of antiestrogen adjuvant therapies for MB, and findings that soy  
53 phytoestrogens also decrease sensitivity of MB cells to cytotoxic chemotherapeutics suggest that  
54 decreased exposure to environmental estrogens may benefit MB patient responses to  
55 chemotherapy.

56

57 **Keywords:** chemotherapy, cytoprotection, concentration-response, estrogen, in vitro,  
58 isoflavones, medulloblastoma, phytoestrogen

## 59 **Background**

60 Medulloblastoma (MB) arise from neural precursors of the cerebellum and brainstem and  
61 are associated with the 4<sup>th</sup> ventricle. They are the most common central nervous system (CNS)  
62 malignancy in childhood with a peak incidence around 5 years of age [1-4]. These primitive  
63 neuroectodermal tumors (PNETs) while rare, with an overall incidence rate of 1.5 per million  
64 population, are more common in children 1-9 years of age (affecting 9.6 per million children)  
65 compared to adults 19 years of age and older, who have an incidence rate of 0.6 per million [5].  
66 Less commonly, PNETs may develop in the cerebral hemisphere, these tumors are referred to  
67 CNS-PNETs. While sharing histological similarities, CNS-PNET tumors are genetically distinct  
68 from MB and have an overall incidence rate of 0.62 per million [5-8]. Histopathology grading  
69 has classically been used to separate MB into subgroups which differ with regard to biomarker  
70 profile and prognosis [9]. These subgroups include classic MB, desmoplastic MB, MB with  
71 excessive nodularity (MBEN), large cell MB and anaplastic MB [9-11]. Due to cellular and  
72 molecular heterogeneity across histological subgroups, and even within a singular tumor, a  
73 newer approach to MB grading has emerged that relies on comparative genome, transcriptome,  
74 and epigenetic analysis which may allow improved risk stratification and individualized targeted  
75 treatments [12]. By consensus four molecular subgroups are now recognized, they include  
76 wingless (WNT), sonic hedgehog (SHH), group 3 and group 4 [12-15]. Each subgroup has a  
77 characteristic genetic profile and gene expression patterns that appear to drive tumor progression,  
78 predict therapeutic responsiveness and prognosis. Further refinement of these molecular analyses  
79 has also found that pediatric and adult MB, are both histologically and genetically different  
80 diseases with characteristic differences in mutation accumulation, chromosomal deletion and  
81 amplification and distinctive prognosis and survival rates [16-18].

82           Advancements in multimodal MB therapy utilizing maximal tumor resection, followed  
83 by radiation, and chemotherapy have greatly improved the chances of patient survival with 5  
84 year overall survival rates for MB reaching between 60-80% depending on specific tumor grade  
85 or molecular subtype; the survival rate for CNS-PNET patients is approximately 50% [18].  
86 Conventional standard of care for MB most often involves combined radiation and  
87 polychemotherapy that results in improved outcomes compared to treatments limited to only  
88 tumor excision, radiation therapy or single agent chemotherapy [8, 19, 20]. Cytotoxic  
89 chemotherapy treatments for standard risk MB include a combination of cisplatin,  
90 cyclophosphamide, lomustine, and vincristine [21]. These agents vary in their mechanism of  
91 actions with cisplatin causing apoptosis due to DNA cross-linking, cyclophosphamide and  
92 lomustine are DNA alkylating agents, and the vinca alkaloid vincristine inhibits cell division by  
93 binding tubulin to inhibit microtubule formation [21]. Despite the success of these combined  
94 treatments, greater than 70% of MB survivors experience life-long neurological disabilities that  
95 include cognitive, motor, and/or vision impairments, as well as psychosocial dysfunction.  
96 Additionally, more than half of survivors also have severe endocrine impairments, which further  
97 contribute to a greatly diminished quality of life for MB survivors [22-24]. Thus, there is  
98 continued need to refine existing therapy and develop new adjuvant therapies that further  
99 improve MB and CNS-PNET cure rates, while reducing the life-long adverse effects of both the  
100 disease and its treatment [25].

101           Previous study has demonstrated that growth and migration of MB and CNS-PNET cells  
102 and tumors are responsive to estrogen ( $17\beta$ -estradiol; E2) and other estrogenic compounds [26-  
103 30]. In some human MB cell lines and in genetic mouse models of MB, the growth stimulating  
104 effects of estrogen are mediated through ER $\beta$  regulation of prosurvival insulin-like growth factor

105 1 (IGF1) signaling pathways that acts to reduce tumor cell apoptosis [26-28]. Results from  
106 additional studies have also demonstrated that therapeutic doses of the ER antagonist fulvestrant  
107 inhibited MB cell growth and migration in cultured human MB cell lines, blocked the growth of  
108 MB tumors in nude mice, and decreased tumor growth and progression in mouse genetic models  
109 of MB that most closely resemble the SHH subtype of MB [26-28]. These findings support the  
110 potential efficacy of anti-estrogen treatments, or other interventions to decrease ER activity, as  
111 potentially beneficial adjuvants for MB management. The role of ER $\beta$  in MB pathology  
112 however, is controversial in part because the role of ER $\beta$  in cancer progression is in general  
113 poorly understood, with both tumor suppressor and tumor promoting effects of ER $\beta$  having been  
114 reported in different ER expressing tumors [31, 32]. Results from different mouse models of MB  
115 have also found that estrogen and ER $\beta$  activity can decrease MB tumor incidence [33], and *in*  
116 *vitro* studies have suggested that in the Daoy MB cell line, inhibition of ER $\beta$  activity decreases  
117 sensitivity to cisplatin by enhancing Rad51 mediated DNA repair mechanisms [34]. To  
118 investigate the role of estrogens in MB in more detail, we have used cell viability and clonogenic  
119 survival assays to determine whether the cytoprotective effects of E2 protected human D283  
120 Med MB cells from the cytotoxic actions of the MB chemotherapeutic drugs cisplatin,  
121 vincristine, or lomustine. The effects of E2 on cisplatin chemosensitivity were also determined in  
122 the MB cell line Daoy and a CNS-PNET cell line PFSK1. Additional experiments were done to  
123 determine whether the ER antagonist fulvestrant or the selective ER antagonist tamoxifen  
124 blocked the cytoprotective actions of 17 $\beta$ -estradiol, and whether other ER selective agonists, and  
125 low concentrations of the soy-derived phytoestrogens genistein, daidzein, and s-equol were able  
126 to impact D283 Med chemosensitivity.

## 127 **Materials and Methods**

### 128 Steroids and Pharmacological Agents

129 Dimethylsulfoxide (DMSO), 3-(4,5-Dimethyl-2-thiazolyl)-2,5-diphenyl-2H-tetrazolium  
130 bromide (MTT), 4-hydroxytamoxifen (4-OHT), 4',7-dihydroxyisoflavonoid (daidzein), 4',5,7-  
131 trihydroxyisoflavonoid (genistein) and 17 $\beta$ -estradiol (E2) were from Sigma-Aldrich (St. Louis,  
132 MO). 4',7-dihydroxyisoflavan (s-equol) was from Cayman Chemical (Ann Arbor, MI).  
133 Fulvestrant (ICI 182, 780), 4,4',4''-(4-propyl-[1*H*]-pyrazole-1,3,5-triyl)trisphenol (PPT), 2,3-  
134 bis(4-Hydroxyphenyl)-propionitrile (DPN) and 4-[2-Phenyl-5,7-bis(trifluoromethyl)pyrazolo  
135 [1,5-*a*]pyrimidin-3-yl]phenol (PHTPP) were from Tocris Bioscience (R&D Systems, Inc.,  
136 Minneapolis, MN). Cisplatin, vincristine, and lomustine were from Selleck Chemical (Houston,  
137 TX). Cisplatin was usually prepared as a 1 mg/mL (3.3 mmole/L) stock solution in PBS, in  
138 assays involving hydrophobic ligands in DMSO results were normalized using a standard curve  
139 comparing D283 Med cytotoxicity in the presence or absence of DMSO [35].

### 140 Cell Culture Conditions

141 All cell lines were acquired from the American Type Culture Collection, cryopreserved and  
142 expanded for analysis. The unique growth and morphological characteristics of each cell line was  
143 retained throughout the duration of the study. Details of cell culture methods were described  
144 previously [26-28]. Briefly, D283 Med and Daoy cells were grown in a humidified incubator at  
145 37<sup>0</sup>C and 5% CO<sub>2</sub> atmosphere in growth media containing minimum essential media (MEM)  
146 with Earle's Balanced Salt Solution (EBSS). Growth media for PFSK1 cells was RPMI 1640.  
147 Media was supplemented with 10% fetal bovine serum (FBS), 4 mM L-glutamine, 100 U/ml  
148 penicillin and 100  $\mu$ g/ml streptomycin (Thermo Fisher Scientific, Waltham, MA). For general  
149 growth and expansion, D283 Med cells were maintained in suspension culture at 0.5 – 1 x 10<sup>6</sup>

150 cells/ml. Daoy and PFSK1 cells were maintained between 20 and 80% confluence. Growth  
151 media was refreshed every 2-3 days with cells split at a ratio of 1:5.

152 For Daoy growth analysis cells from subconfluent cultures were harvested by dissociation  
153 with 0.2 mM EDTA in PBS, resuspended in phenol-free supplemented with in 10% charcoal  
154 stripped FBS (CSS) and viable cell numbers determined by direct cell counting of trypan blue-  
155 excluding cells with a hemacytometer. Cells were seeded in triplicate into 60 mm culture  
156 dishes (22.06 cm<sup>2</sup>). Optimization experiments with cells plated at an initial density of 1,000,  
157 3,000, 10,000, or 20,000 cells per dish in 10% FBS, 10% CSS plus or minus various  
158 concentrations of E2 indicated that 3000 cells per well allowed optimal viability analysis at all  
159 time points [28]. Cultures were untreated, or treated with DMSO (0.001%), 10 nM E2, that was  
160 serially diluted into fresh DMSO/PBS vehicle to obtain an equal 0.001% final DMSO  
161 concentration in all cultures, and 10% FBS served as a positive control. At 24, 48, 72 and 96  
162 hours post-treatment viable cell numbers were determined by direct counting of trypan blue-  
163 excluding cells.

#### 164 Viability Analysis

165 Viability was assessed by accumulation of formazan by reduction 3-(4,5-dimethylthiazol-  
166 2-yl)-2,5-diphenyltetrazolium bromide (MTT) or 3-(4,5-dimethylthiazol-2-yl)-5-(3-  
167 carboxymethoxyphenyl)-2-(4-sulfophenyl)-2H-tetrazolium (MTS) in the presence of phenazine  
168 methosulfate (CellTiter 96<sup>®</sup> Aqueous One Solution Cell Proliferation Assay; Promega) as  
169 previously described [36]. To avoid any potential MTT/MTS reduction assay bias, effects of E2  
170 on D283 Med cell viability were confirmed with separate experiments using an Alamar Blue  
171 (resazurine) fluorescent dye assay at excitation wavelength of 535 nm (20 nm bandwidth) and an  
172 emission wavelength of 590 nm (35 nm bandwidth) [37]. Comparable results were observed for



173 all assays. Regardless of specific assay, growing cells were harvested, counted and resuspended  
174 at a desired density in 10% CSS supplemented MEM/EBSS with 10 nM E2, or desired final  
175 concentration of fulvestrant or the vehicle control (0.01% DMSO) prior to cisplatin exposure.  
176 Cultures were incubated at 37°C in 5% CO<sub>2</sub> overnight (18-24 hours) at which time cells were  
177 exposed to the desired final concentration of cisplatin and incubated an additional 48 hours prior  
178 to viability analysis. For each bioassay D283 Med cells were seeded in 96 well plates at 1 x 10<sup>5</sup>  
179 cells/mL (1 - 2 x 10<sup>4</sup> cells per well) based on results of preliminary experiments to optimize each  
180 assay.

#### 181 Clonogenic Assay

182 Clonogenic/colony forming assays were adapted from published protocols [38, 39]. Cell  
183 were seeded at 1000 cells per well in 6-well tissue culture plates in 2 mL of 10% CSS  
184 supplemented phenol red free MEM/EBSS. For D283 Med cells poly-L-lysine coated culture  
185 plates were used allowing adherent growth. Exposure to ER ligands were started 24 hours prior  
186 to chemotherapeutic exposure and continued during and following chemotherapeutic agent  
187 exposure. For chemotherapeutic drug exposures, 0.5 mL of a 5x stock prepared in cell culture  
188 media was added to each well. After 6 hours (cisplatin) or 24 hours (vincristine and lomustine)  
189 of exposure, media was aspirated, cells were washed 2 times with chemotherapeutic compound-  
190 free media, and then cultured in 2.5 mL of growth media at 37°C in 5% CO<sub>2</sub> until visible  
191 colonies containing >50 cells were observed. Preliminary range finding concentration response  
192 analysis was performed with each chemotherapeutic agent for each cell line, at the  
193 concentrations used between 5-40 clones per plate were typically observe for vehicle cultures.  
194 Incubation times were typically between 2-3 weeks with growth media refreshed every 2-3 days.  
195 Colonies were fixed and stained with 1% methylene blue in 50% ethanol (Fisher Scientific,

196   Pittsburg, PA) or 0.1% coomassie brilliant blue in methanol (Bio-Rad, Hercules, CA). Digital  
197   images were captured and colonies were counted using an Alpha Innotech FluorChem FC2  
198   imager (ProteinSimple, Santa Clara, CA) and Adobe Photoshop (Adobe Systems Inc., San Jose,  
199   CA).

#### 200   Caspase Activity

201           All methods were done as previously described with D283 Med cells seeded into 96 well  
202   plates at a density of  $1 \times 10^6$  cells/ml in phenol red free MEM/EBSS lacking L-glutamine, 10%  
203   CSS and supplemented with increasing concentrations of daidzein, genistein or s-equol [27].  
204   Cells exposed to 10 nM E2 or DMSO vehicle served as controls. Cells were lysed 48 hours after  
205   seeding with 20 mM Tris-HCl (pH 7.5) with 150 mM NaCl, 1 mM EDTA, 1 mM EGTA, and 1%  
206   Triton. Cell lysates were assayed for protein concentration using the BioRad Dc protein assay  
207   (Bio-Rad, Hercules, CA). Caspase activity ( $\text{pmol of pNA hour}^{-1} \text{ mg protein}^{-1}$ ) from 10  $\mu\text{g}$  of  
208   lysate was determined by comparing the amount p-nitroaniline (pNA) liberated from Ac-DEVD-  
209   pNA (Enzo Life Sciences, Farmingdale, NY) with a standard curve derived from known  
210   concentrations of pNA. Normalized caspase activity for each phytoestrogen are reported as a  
211   percentage of the maximal inhibitory effect of 10 nM E2.

#### 212   Data and Statistical Analysis

213           All experiments were repeated a minimum of 3 times. Statistical analysis was conducted  
214   using one way ANOVA or two-way ANOVA with Holm-Sidak's multiple comparisons test. A  
215   minimal level of statistical significance for differences between groups was  $p < 0.05$  and unless  
216   otherwise noted is indicated by \*. Concentration response curves and  $\text{IC}_{50}$  estimates were  
217   generated using a normalized variable slope Hill model. Analysis was performed using  
218   GraphPad Prism v6 software (GraphPad Software, Inc., La Jolla, CA).

## 219 **Results**

220           Compared to vehicle treated D283 Med cells, the cytotoxic effects of cisplatin were  
221 decreased in the presence of 10 nM E2 (Fig. 1A-B). When analyzed by an MTS reduction assay  
222 the presence of E2 increased the observed IC<sub>50</sub> of cisplatin from 5.6 μM (95% CI 4.7 - 6.9) to  
223 14.7 μM (95% CI 10.5 - 20.5; Fig. 1A). Two-way ANOVA revealed a significant effect of  
224 cisplatin concentrations [F (5, 36) = 49.65, p < .0001], a significant effect of 10 nM E2 [F (1, 36)  
225 = 10.07, p < .0031], and a significant interaction between cisplatin concentration and E2  
226 exposure [F (5, 36) = 5.873, p= 0.0005]. Shown in Fig. 1B are results of independent  
227 experiments using the resazurin reduction bioassay as an indicator of D283 Med viability where  
228 the IC<sub>50</sub> for cisplatin cytotoxicity in control cultures lacking E2 was calculated as 4.8 μM (95%  
229 CI 4.1 - 5.7). Revealing that the observed effects were not an assay specific effect, the presence  
230 of 10 nM E2 similarly increased the calculated IC<sub>50</sub> for cisplatin cytotoxicity to 9.4 μM (95% CI  
231 7.7 - 11.5). The cytoprotective effects of E2 were blocked by the ER antagonist fulvestrant (ICI  
232 182,780). In the presence of both E2 and fulvestrant, the calculated cisplatin IC<sub>50</sub> was 4.2 μM  
233 (95% CI 3.2 – 5.39) which was indistinguishable from control (Fig. 1B).

234           Following the initial characterization studies of the effects of E2 on D283 Med cells in  
235 viability assays, a clonogenic colony forming assay [38, 39] in which cytotoxic treatments  
236 reproducibly caused 99-99.5% loss of viability was used to better determine the effects of  
237 estrogens effects on the cytotoxicity of cisplatin. Based on preliminary concentration response  
238 analysis (Fig. 1C), the effect of 10 nM E2 on chemosensitivity of D283 Med cells to increasing  
239 cisplatin concentrations (2, 4, or 9 μM) was characterized (Fig. 1D-E). At each cisplatin  
240 concentration E2 was significantly cytoprotective [F (1, 18) = 311.6, p < .0001; p < .0001 for  
241 each cisplatin concentration]. To determine whether the observed protective effect of E2 in D283

242 Med cells was independent of the cytotoxic mechanism of action, additional experiments were  
243 performed to test the impact of E2 on lomustine and vincristine cytotoxicity (Fig. 2). Initial  
244 range-finding concentration response analysis in the D283 Med clonogenic assay indicated an IC<sub>50</sub>  
245 for lomustine of 12.1 μM (95% CI 11.7 – 12.6) (Fig. 2A) and 1.5 nM (95% CI 0.74 – 3.1) for  
246 vincristine (Fig. 2B). The presence of E2 significantly protected D283 Med cells from the  
247 cytotoxic effect of lomustine [F (1, 30) = 74.64, p < .0001] at each concentration tested (Fig. 2C;  
248 10 μM p = .0036, and p < .0001 for 20 and 40 μM). For vincristine 10 nM E2 also significantly  
249 [F (1, 18) = 196.2, p < .0001] decreased cytotoxicity at each concentration (Fig. 2D; 5 and 10  
250 nM, p < .0001 and p = .0003 for 20 nM).

251 Compared to vehicle treated D283 Med cells exposed to 4 μM cisplatin, E2 (p < .0001)  
252 and the ERβ selective agonist DPN (p < .0001) each increased numbers of surviving colonies  
253 compared to cisplatin alone control cultures (Fig. 3A-B). The cytotoxic effect of 4 μM cisplatin  
254 was not significantly changed by the ERα selective agonist PPT (p > .9999). At a final  
255 concentration of 10 nM, the soy isoflavonoids genistein (p = .0239), daidzein (p < .0001), or the  
256 bacterial metabolite of daidzein, (s)-equol (p < .0001) each significantly protected D283 Med  
257 cells from the cytotoxic effect of cisplatin (Fig. 3B). The relative magnitude of the protective  
258 effects for each of the compounds is consistent with their selectivity and potency at ERβ [40].  
259 Increasing concentrations of each phytoestrogen significantly [F (2, 256) = 4.85, p < .0086] and  
260 dose-dependently decreased caspase 3 activity in D283 Med cells. The decrease in caspase  
261 activity mirrored the cytoprotective effects seen in the clonogenic assay (Fig. 3B). The  
262 differences in the suppression of caspase activity compared to control reached a significant  
263 difference in the 10 nM (10<sup>-8</sup>M) groups for s-equol and daidzein and for genistein at 100 nM  
264 (Fig. 3C).

265           The cytoprotective effects of E2 in D283 Med cells exposed to cisplatin ( $p = .0001$ ) were  
266 eliminated by the non-selective ER antagonist fulvestrant (10 nM; ICI; E2 vs. E2/fulvestrant  $p =$   
267  $< .0001$ ; Fig. 3D-E), the selective estrogen receptor modulator 4-OH tamoxifen (1  $\mu$ M; E2 vs  
268 E2/tamoxifen  $p = < .0001$ ) or the ER $\beta$  selective antagonist PHTPP (5  $\mu$ M; E2 vs E2/PHTPP  $p =$   
269  $< .0001$ ; Fig. 3E). In CNS-PNET derived PFSK1 cells, 10 nM E2 also resulted in increased  
270 survival [ $F(1, 34) = 62.30, p < .0001$ ], with a clear decrease in sensitivity to the cytotoxic effects  
271 observed for all three cisplatin concentrations tested (Fig. 4A). Fulvestrant (10 nM) also blocked  
272 the cytoprotective effects of 10 nM E2 ( $p = .0213$ ; Fig. 4B). In contrast to both D283 Med and  
273 PFSK1 cells, the cytotoxic effects of cisplatin were increased in Daoy cells by the presence of 10  
274 nM E2 where a significant decrease [ $F(1, 18) = 62.75, p < .0001$ ] in surviving colony formation  
275 was observed in the estrogen treated cultures (Fig. 4C). The increased sensitivity of Daoy to  
276 cisplatin in the presence of E2 ( $p = .0194$ ) was also eliminated by fulvestrant ( $p = .0012$ ; Fig.  
277 4D) and 10 nM E2 did not stimulate growth of Daoy cells (Fig. 4E).

278 Discussion

279           The use of aggressive multimodal treatments has resulted in increased survival for MB  
280 patients, most survivors however suffer from life-long adverse effects that greatly diminish their  
281 quality of life [22]. The presented findings demonstrate that E2 can increase the resistance to  
282 cytotoxic chemotherapeutics commonly used to treat MB, and that blockade of estrogen receptor  
283 activity inhibits this effect. These findings suggest that ER antagonists may be a useful adjuvant  
284 approach to current cytotoxic chemotherapy used to treat MB. The cytoprotective effects of  
285 estrogens, either endogenous or derived from environmental sources such as diet or estrogenic  
286 endocrine disruptors from medical devices [41, 42], if translatable to MB patients, would require  
287 more aggressive chemotherapeutic interventions to achieve a cure in patients with increased  
288 levels of estrogenic activities. In previous studies, ER $\beta$  activation in MB and CNS-PNET tumor  
289 cells was found to stimulate cytoprotective mechanisms which decreased caspases 3 activity, and  
290 loss of ER $\beta$  activity inhibited MB tumor growth and increased apoptosis *in vivo* [27]. The results  
291 of the current study lend additional evidence that ER $\beta$  initiated mechanisms promote MB and  
292 CNS-PNET survival by demonstrating that the ER $\beta$  selective agonist DPN protected D283 Med  
293 cells from cisplatin induced cytotoxicity, and that inhibition of ER $\beta$  by PHTPP blocked the  
294 protective effect of E2. Along with demonstrating mechanistic involvement of ER $\beta$ , the ability  
295 of the anti-estrogen chemotherapeutics fulvestrant and tamoxifen to each block the protective  
296 actions of estrogen in MB and CNS-PNET support previous findings which demonstrated that  
297 antiestrogen chemotherapeutics block the growth of MB tumors *in vivo* [26, 27] and that  
298 tamoxifen can sensitize MB cells to the cytotoxic effects of the topoisomerase inhibitor  
299 etoposide [43].

300 Specific treatments for MB and CNS-PNETS is constantly evolving. Depending on  
301 specific risk stratification, the current standard of care often includes maximal surgical resection  
302 that allows preservation of neurological function, postoperative radiation therapy, followed by  
303 chemotherapy employing a combination of the DNA crosslinking agent cisplatin, a DNA  
304 alkylating agents such as lomustine, and vincristine, a microtubule inhibitor [21, 44]. Each of  
305 these drugs works in different ways to stop the growth of tumor cells, either by killing the cells,  
306 or by stopping them from dividing. As for other cancers, treatment for MB and CNS-PNET has  
307 leveraged the fundamental understanding that cancer patients given multimodal treatments which  
308 include some combination of surgical tumor resection, radiation, plus a single or multiple  
309 chemotherapy agents, have improved short and long term outcomes with the combine effect of  
310 multiple cytotoxic treatments arising because each targets different processes involved in tumor  
311 cell survival [45, 46]. Targeted cancer therapies based on molecular markers such as endocrine  
312 therapy for prostate cancer or inhibiting ER activity in ER-positive breast cancer also benefits  
313 from a multimodal treatment approach that can includes endocrine based therapies, along with  
314 chemotherapy involving single or multiple cytotoxic agents [19, 20, 47-51]. Because E2  
315 increases MB tumor survival through a general cytoprotective mechanism by increasing IGF-  
316 signaling [27], we hypothesized that its cytoprotective effects would decrease the cytotoxic  
317 effects of chemotherapeutic agents used for MB treatment independent of their mechanism of  
318 action. The presented studies, focused primarily on the most commonly used MB chemotherapy  
319 drug cisplatin (a DNA crosslinking agent), found that estrogen and soy-derived phytoestrogens  
320 were modestly cytoprotective, typically causing about a 2 fold increase in viability. The  
321 cytotoxic effects of both the alkylating agent lomustine and the microtubule inhibitor vincristine  
322 were also decreased by E2 in D283 Med MB cells demonstrating that the estrogen-induced

323 cytoprotective mechanisms were in fact independent of the mechanism by which these  
324 chemotherapeutic agents act to initiate MB cell death.

325 We and others have found that Daoy cells express ER $\beta$ , but the pattern of ER $\beta$  protein  
326 isoform expression is distinctive from other MB and CNS-PNET cells in which E2 has  
327 cytoprotective activities [26, 52]. We also previously found that estrogen stimulated the  
328 migration of Daoy cells by an ER $\beta$ -dependent mechanism that was identical to that observed in  
329 other MB and CNS-PNET cells [26]. It was found here however, that unlike other MB cells, E2  
330 alone did not increase viability of Daoy cells, instead the presence of E2 increased sensitivity of  
331 these cells to cisplatin cytotoxicity. It was also observed that inhibition of estrogen activity with  
332 10 nM fulvestrant (a concentration that is 10-fold more than required to fully inhibit estrogen  
333 dependent growth of MCF-7 breast cancer cells [53]) blocked estrogen mediated sensitization of  
334 Daoy cells to cisplatin. At this fulvestrant concentration the classical nuclear receptor  
335 transactional activities of the ERs are inhibited, suggesting that blockage of ER $\beta$  activity is  
336 responsible for the observed chemoresistance to cisplatin, fulvestrant however, also acts as a full  
337 agonist of rapid ER $\beta$  signaling in cerebellar granule cell precursors [54]. The impact of  
338 fulvestrant agonist activity on rapid estrogen signaling in MB remains to be clearly defined.

339 Urbanska and colleagues, while not investigating the growth promoting actions of  
340 estrogen, previously reported that ER $\beta$  could interact with nuclear IRS1 to inhibit Rad51  
341 mediated DNA repair mechanisms in Daoy cells, findings that suggested estrogen's ability to  
342 increase Daoy cell sensitivity to cisplatin might involve an ER $\beta$ /IRS1 mediated decrease in  
343 Rad51 homologous recombination DNA repair mechanisms [52]. Their additional results from  
344 experiments using a much higher 10  $\mu$ M concentration of fulvestrant (IC<sub>50</sub> = 0.29 nM) found it  
345 caused resistance of Daoy and D384 cells to the cytotoxic actions of cisplatin, effects that were



346 not significant in the D283 Med cells [34]. The studies presented here, using lower  
347 concentrations of fulvestrant, failed to observe increased sensitivity of Daoy cells to cisplatin. In  
348 light of the higher concentrations of fulvestrant used for those previous experiments, it is  
349 possible that the observed protective effects of fulvestrant were not specific and involved  
350 activities other than inhibition of ER $\beta$ . Another possible explanation for decreased cytotoxicity  
351 could be that DMSO, if used as a vehicle, was decreasing the efficacy of cisplatin. The ability of  
352 DMSO to greatly decrease the cytotoxic activity of cisplatin and other platinum  
353 chemotherapeutic drugs has previously been characterized in detail [35]. It is also valuable to  
354 consider the contracting results observed here, and in other previous studies, in view of the fact  
355 that current molecular profiling and cytogenetic data supports the conclusion that the Daoy cell  
356 line, while most closely resembling the SHH molecular subgroup, is markedly different from all  
357 primary MB tumor subgroups and distinctive from MB cell lines like D283 Med that retain the  
358 hallmarks of MYC amplification and i17q which are associated with poor outcomes [55, 56]. It  
359 is especially notable that the hypertetraploid karyotype of the Daoy cells does not resemble MB  
360 karyotypes, and the presence of two X chromosomes and a lack of a Y chromosome, is  
361 inconsistent with the sex of the male patient from which the original tumor biopsy was isolated  
362 [42]. In spite of these caveats, it is possible that the observed differences in the impact of E2 on  
363 Daoy and D283 Med MB cells may actually reflect the well-known heterogeneity of MB. It is  
364 likely that different molecular subtypes of MB and even different populations of cells in a single  
365 patient's tumor may differently respond to ER agonists and antagonists. This raises the  
366 interesting possibility that the responses to estrogen in MB are heterogeneous and that some  
367 populations of cells are differentially responsive to estrogen's effects.  
368

369 **Conclusions**

370           The presented results demonstrate that the cytoprotective effects of E2, which can be cell  
371 line dependent, are clearly chemoprotective in some MB and CNS-PNET cell lines. The results  
372 of additional experiments also demonstrated that like E2, low and physiological levels [41] of the  
373 soy-derived phytoestrogens genistein, daidzein, and equol can decrease caspase activity in D283  
374 Med MB cells resulting in an estrogen-like inhibition of the cytotoxic actions of cisplatin. The  
375 finding that soy phytoestrogens also decrease sensitivity to the cytotoxic actions of cisplatin  
376 suggest that attention to decreasing exposures to environmental estrogens that include not only  
377 phytochemicals but also xenobiotic endocrine disruptors may benefit MB patients undergoing  
378 cytotoxic chemotherapy.

379 **List of abbreviations:**

380 3-(4,5-dimethylthiazol-2-yl)-5-(3-carboxymethoxyphenyl)-2-(4-sulfophenyl)-2H-tetrazolium  
381 (MTS)

382 3-(4,5-dimethylthiazol-2-yl)-2,5-diphenyltetrazolium bromide (MTT)

383 17 $\beta$ -estradiol (E2)

384 central nervous system primitive neuroectodermal tumors (CNS-PNET)

385 charcoal stripped FBS (CSS)

386 Dimethylsulfoxide (DMSO)

387 Earle's Balanced Salt Solution (EBSS)

388 fetal bovine serum (FBS)

389 medulloblastoma (MB)

390 medulloblastoma with excessive nodularity (MBEN)

391 minimum essential media (MEM)

392 p-nitroaniline (pNA)

393 primitive neuroectodermal tumors (PNETs)

394 sonic hedgehog (SHH)

395 wingless (WNT)

396

397

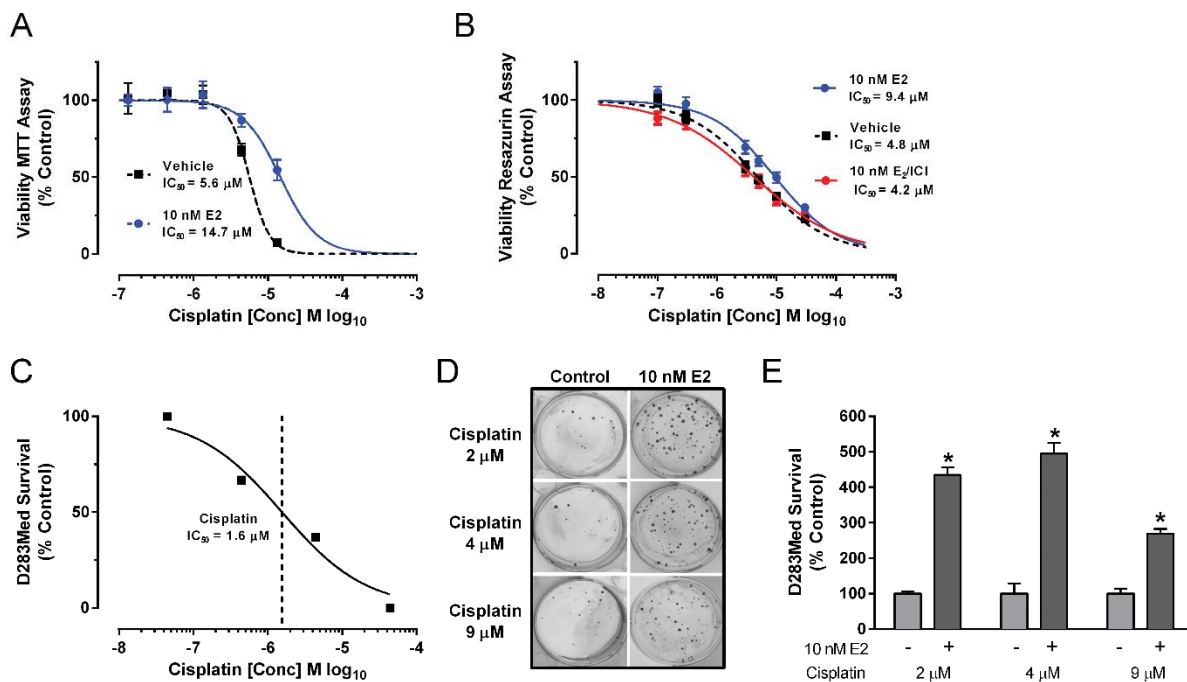

398  
 399 **Fig. 1 The cytoprotective effect of 10 nM E2 on cisplatin cytotoxicity in D283 Med cells. (A)**  
 400 Concentration response analysis of D283 Med viability following exposure to increasing  
 401 concentrations of cisplatin with and without 10 nM E2 using the MTS-reduction assay. All data  
 402 is expressed as a percentage ( $\pm$  SEM; n = 4 per dose group) relative to vehicle treated control  
 403 cultures. Concentration response curves and indicated IC<sub>50</sub> values for cisplatin inhibition of  
 404 viability were calculated using a normalized variable slope Hill model. (B) Concentration  
 405 response analysis of the cytotoxic effects of cisplatin on D283 Med cells in the presence of 10  
 406 nM E2 plus or minus 10 nM fulvestrant (ICI 182,780) using the resazurine fluorescent dye assay  
 407 (for vehicle and E2 groups n = 28 replicates; E2/ICI n = 20 replicates from 3 separate  
 408 experiments). (C) Initial range finding concentration response analysis of the cytotoxic effects of  
 409 cisplatin in D283 Med using a colony forming (clonogenic) assay of cell survival defined an IC<sub>50</sub>  
 410 of 1.6 μM. (D) Representative images of plates stained with 0.1% coomassie brilliant blue in  
 411 methanol to visualize colonies formed from cultures of 1000 D283 Med cells in the presence of

412 10 nM E2 or vehicle control that were treated with 2, 4 or 9  $\mu$ M cisplatin. (E) Quantification of  
413 surviving colony numbers from clonogenic assays of D283 Med cells exposed to 2, 4, or 9  $\mu$ M  
414 cisplatin with or without 10 nM E2 (n = 4 for each group). All results are expressed as mean  $\pm$   
415 SEM. Significant differences from the control group were determined by two-way ANOVA  
416 followed by post-test analysis; \*  $p \leq .05$ .

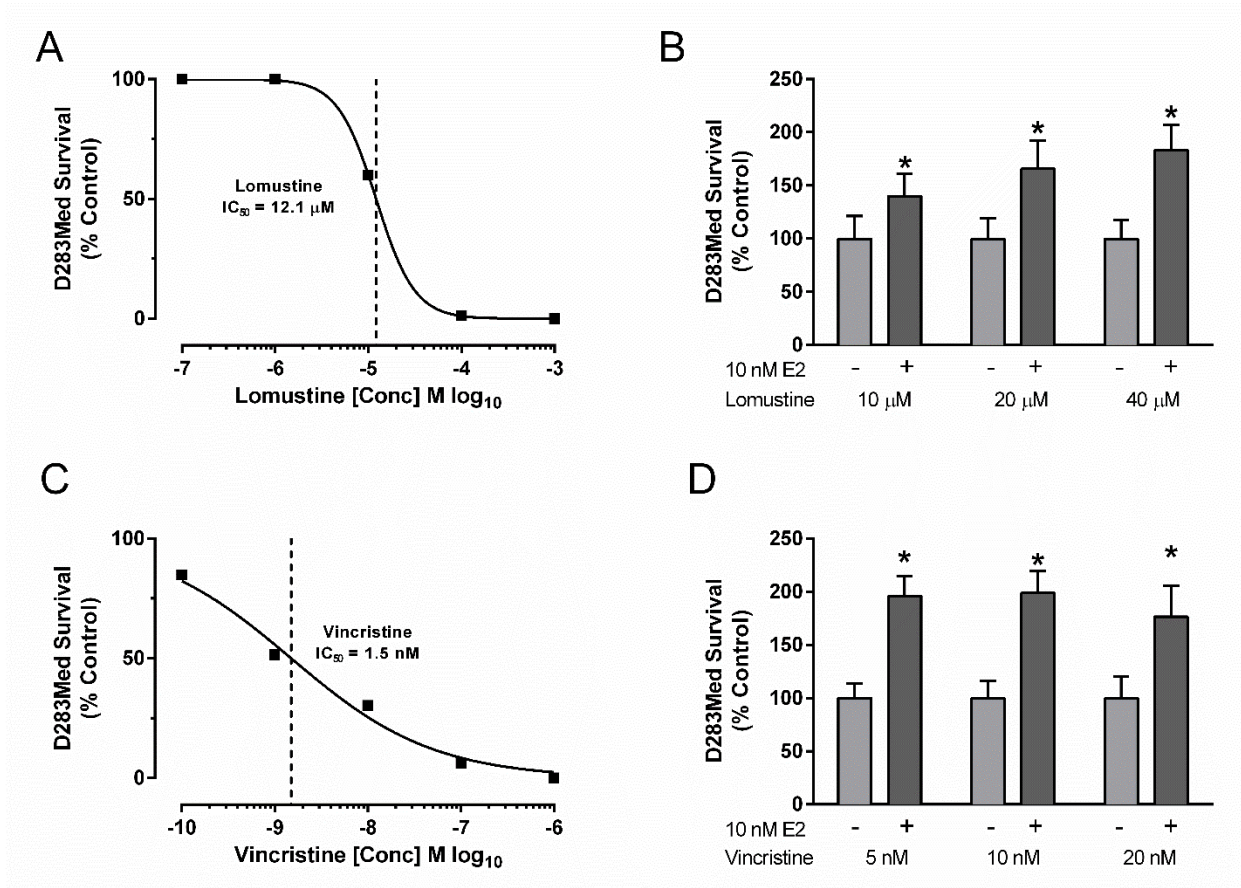

417  
418 **Fig. 2. The effects of E2 exposure on lomustine and vincristine cytotoxicity in D283 Med**  
419 **cells.** Initial range finding concentration response analysis of the cytotoxic effects of (A)  
420 lomustine ( $IC_{50} = 12 \mu M$ ) and (B) vincristine ( $IC_{50} = 1.5 nM$ ) on D283 Med in a clonogenic  
421 assay of cell survival. (C) Quantification of surviving colony numbers from clonogenic assays of  
422 D283 Med cells exposed to 10, 20, or 40  $\mu M$  lomustine with or without 10 nM E2 (n = 6 for each  
423 group). (D) Quantification of colony number from clonogenic assays of D283 Med cells

424 exposed to 5, 10, or 20 nM vincristine with or without 10 nM E2 (n = 8 for each group). All  
425 results are expressed as mean  $\pm$  SEM. Significant differences from the control group were  
426 determined by two-way ANOVA followed by Holm-Sidak's post-test analysis and is indicated  
427 above the error bars; \*  $p \leq .05$ .

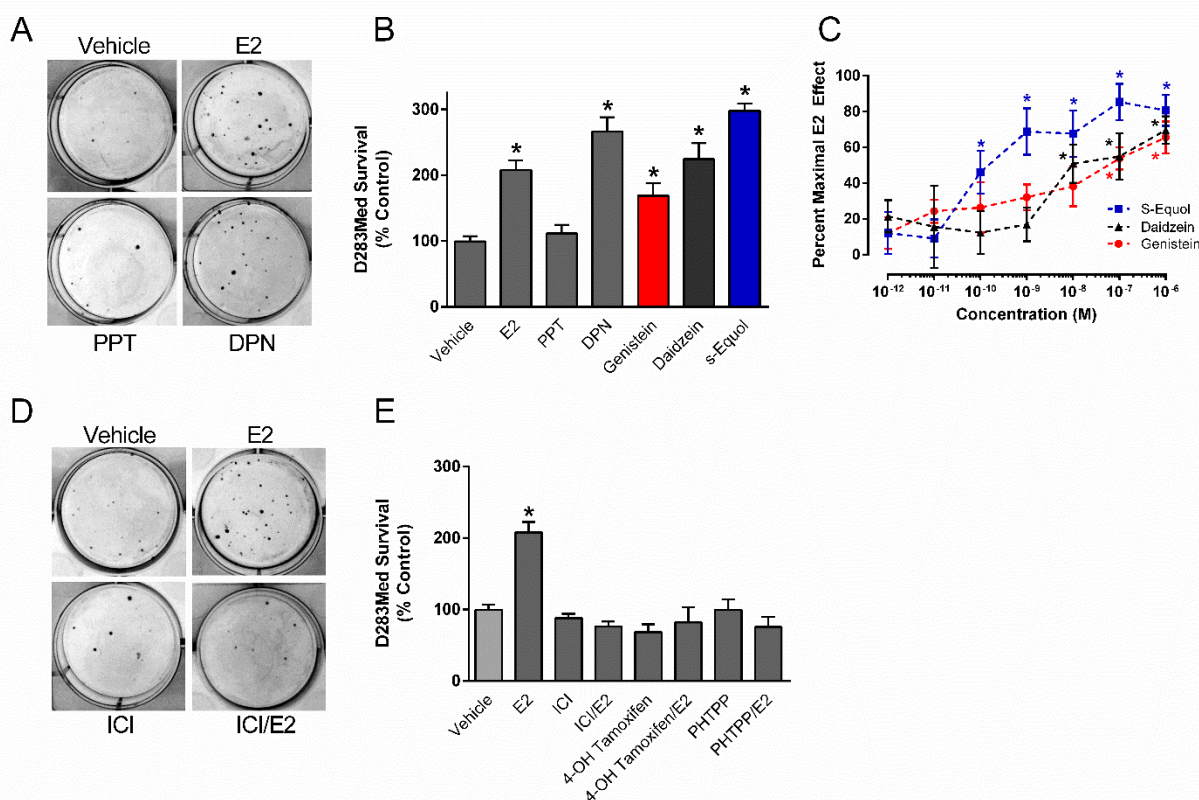

428 **Fig. 3. The effects of selective and nonselective ER ligands and soy-derived isoflavonoids on**  
429 **cisplatin cytotoxicity in D283 Med cells.** (A) Representative images of surviving coomassie  
430 blue stained colonies from D283 Med cultures cotreated with 4  $\mu$ M cisplatin and either vehicle,  
431 10 nM E2, 10 nM PPT or 10 nM DPN. (B) Quantification of colony number from clonogenic  
432 assays of D283 Med cells cotreated with 4  $\mu$ M cisplatin and vehicle, or 10 nM of E2 (n = 18) ,  
433 PPT (n = 7), DPN (n = 8), or 10 nM of genistein, daidzein, or the daidzein metabolite s-equol (n  
434 = 6 for each isoflavonoid group). (C) Concentration response analysis of estrogenic inhibition of  
435 caspase 3 activity by increasing concentrations of s-equol, daidzein, or genistein in D283 Med  
436



437 cultures. Control cultures exposed to 0.01% DMSO vehicle or 10 nM E2 were treated and  
438 analyzed in parallel. Caspase activity was quantified following a 48 hour incubation period.  
439 Results were normalized to the relative caspase 3 activity of the vehicle control and expressed as  
440 mean percent of the effects for 10 nM E2. The number of samples in each group was n = 10-12.  
441 (D) Representative images of surviving coomassie blue stained colonies from D283 Med cultures  
442 cotreated with 4  $\mu$ M cisplatin and either vehicle, 10 nM E2, 10 nM fulvestrant (ICI), or 10 nM  
443 E2 and 10 nM fulvestrant (ICI/E2). (E) Quantification of colony number from clonogenic assays  
444 of D283 Med cells cotreated with 4  $\mu$ M cisplatin and either vehicle (n = 12), 10 nM E2 (n = 12),  
445 10 nM fulvestrant (ICI; n = 8), 10 nM E2 and 10 nM fulvestrant (ICI/E2; n = 7), 1  $\mu$ M 4-OH  
446 tamoxifen with and without 10 nM E2 (n = 8), or 5  $\mu$ M PHTPP with and without E2 (n = 8). All  
447 results are expressed as mean  $\pm$  SEM. Significant differences from the control group was  
448 determined by one-way ANOVA followed by Holm-Sidak's multiple comparisons tests which is  
449 indicated above the error bars: \* p  $\leq$  .05.

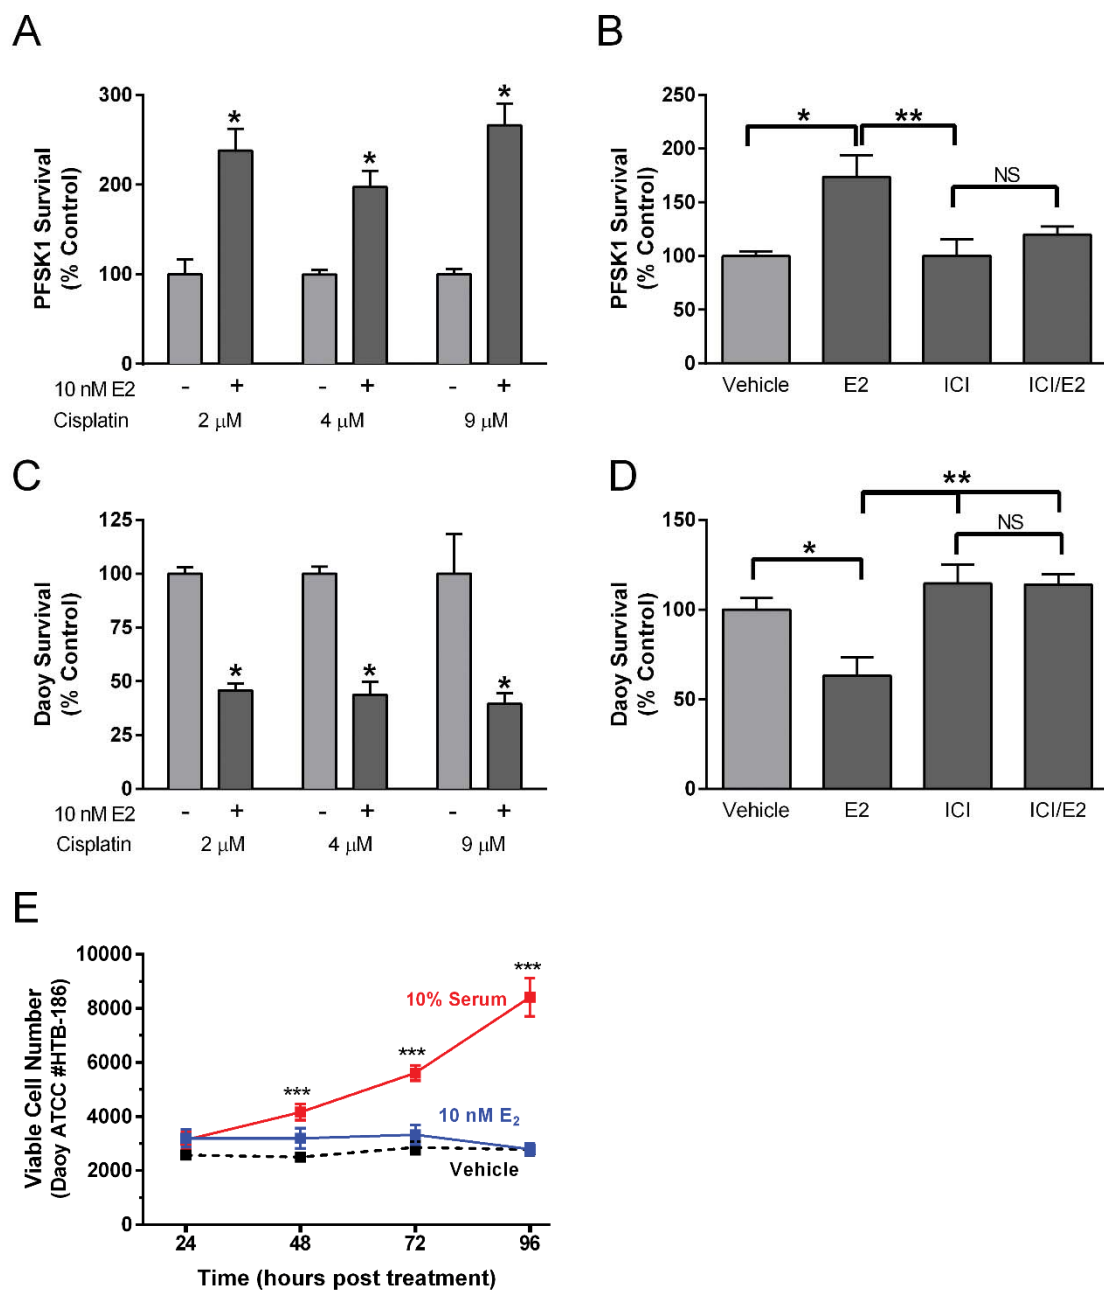

450 **Fig. 4. The effects of E2 exposure on cisplatin cytotoxicity in PFSK1 CNS-PNET cells and**  
 451 **Daoy cells.** (A) Quantification of surviving colony numbers from clonogenic assays of PFSK1  
 452 cells exposed to 2, 4 or 9 μM cisplatin with or without 10 nM E2 (n = 8 for each cisplatin  
 453 treatment group except 4 μM where n = 4). (B) Quantification of colony number from  
 454 clonogenic assays of PFSK1 cells cotreated with 4 μM cisplatin and either vehicle, 10 nM E2, 10  
 455



456 nM fulvestrant (ICI), 10 nM E2 and 10 nM fulvestrant (ICI/E2), n = 4 for each group. (C)  
457 Quantification of surviving colony numbers from clonogenic assays of Daoy cells exposed to 2,  
458 4 or 9  $\mu$ M cisplatin with or without 10 nM E2. For each group n = 4. (D) Quantification of  
459 colony number from clonogenic assays of Daoy cells cotreated with 4  $\mu$ M cisplatin and either  
460 vehicle, 10 nM E2, 10 nM fulvestrant (ICI), 10 nM E2 and 10 nM fulvestrant (ICI/E2), n = 8 for  
461 each group. (E) Analysis of the effects of 10 nM E2 on viability of Daoy cells. At T<sub>0</sub> 3000 cells  
462 were plated into 60 mm cell culture dishes, in growth media cells containing 10% CSS. At each  
463 indicated time point (hours post treatment) cells were harvested and trypan-excluding cells were  
464 counted. Vehicle was 0.0001% DMSO and replacement of CSS with 10% FBS served as a  
465 positive control. At each time point n = 10 for all treatments. Results are expressed as mean  $\pm$   
466 SEM. Significant differences from vehicle control are indicated above the treatment group error  
467 bars with individual comparisons indicated above brackets: \*  $p \leq .05$ ; \*\*  $p \leq 0.01$ ; \*\*\*  $p \leq .001$ ;  
468 NS, not significant.

469 **Declarations:**

470 Ethics approval and consent to participate: N/A

471 Consent for publication: N/A

472 Availability of data and material: All data generated or analyzed during this study are included  
473 in this published article

474 Competing interests: The authors declare that they have no competing interests

475 Funding: These studies were funded in part by RO1 ES015145 grant from NIEHS

476 Authors' contributions: SB analyzed and interpreted data, performed cell viability experiments  
477 and wrote the manuscript; CB performed and analyzed cell viability  
478 and apoptosis experiments; CC performed cell viability assays,  
479 assisted in data collection and analysis and contributed early drafts of  
480 the manuscript; MK performed and analyzed cell growth studies, GM,  
481 FS and KW performed and analyzed cell viability studies.

482

483 **Acknowledgements:**

484 As part of the Department of Pharmacology and Cell Biophysics, Summer Undergraduate  
485 Research Program, Katie Wray was a Dalton Zannoni Summer Undergraduate Research Fellow  
486 of the American Society of Pharmacology and Experimental Therapeutics. We are grateful for  
487 the assistance of Drs. Robert Rapaport and JoEl Schultz and Nancy Thyberg in support of  
488 graduate and undergraduate training.

489 **References**

- 490 1. Ries LAG, Smith MA, Gurney JG, Linet M, Tamra T, Young JL, Brunin GR, Monograph SP:  
491 **Cancer incidence and survival among children and adolescents: United States SEER**  
492 **program 1975–1995.** *NIH Pub No 99–4649* 1999.
- 493 2. Gibson P, Tong Y, Robinson G, Thompson MC, Curre DS, Eden C, Kranenburg TA, Hogg T,  
494 Poppleton H, Martin J, et al: **Subtypes of medulloblastoma have distinct developmental**  
495 **origins.** *Nature* 2010, **468**:1095-1099.
- 496 3. Wang J, Wechsler-Reya RJ: **The role of stem cells and progenitors in the genesis of**  
497 **medulloblastoma.** *Experimental neurology* 2014, **260**:69-73.
- 498 4. Yang ZJ, Ellis T, Markant SL, Read TA, Kessler JD, Bourbonlous M, Schuller U, Machold R,  
499 Fishell G, Rowitch DH, et al: **Medulloblastoma can be initiated by deletion of Patched in**  
500 **lineage-restricted progenitors or stem cells.** *Cancer cell* 2008, **14**:135-145.
- 501 5. Smoll NR, Drummond KJ: **The incidence of medulloblastomas and primitive neurectodermal**  
502 **tumours in adults and children.** *Journal of clinical neuroscience : official journal of the*  
503 *Neurosurgical Society of Australasia* 2012, **19**:1541-1544.
- 504 6. Pomeroy SL, Tamayo P, Gaasenbeek M, Sturla LM, Angelo M, McLaughlin ME, Kim JYH,  
505 Goumnerova LC, Black PM, Lau C, et al: **Prediction of central nervous system embryonal**  
506 **tumour outcome based on gene expression.** *Nature* 2002, **415**:436-442.
- 507 7. Dubuc AM, Northcott PA, Mack S, Witt H, Pfister S, Taylor MD: **The genetics of pediatric**  
508 **brain tumors.** *Current neurology and neuroscience reports* 2010, **10**:215-223.
- 509 8. Mueller S, Chang S: **Pediatric brain tumors: current treatment strategies and future**  
510 **therapeutic approaches.** *Neurotherapeutics : the journal of the American Society for*  
511 *Experimental NeuroTherapeutics* 2009, **6**:570-586.

- 512 9. Louis DN, Ohgaki H, Wiestler OD, Cavenee WK, Burger PC, Jouvet A, Scheithauer BW,  
513 Kleihues P: **The 2007 WHO classification of tumours of the central nervous system.** *Acta*  
514 *neuropathologica* 2007, **114**:97-109.
- 515 10. Ellison D: **Classifying the medulloblastoma: insights from morphology and molecular**  
516 **genetics.** *Neuropathology and applied neurobiology* 2002, **28**:257-282.
- 517 11. Gulino A, Arcella A, Giangaspero F: **Pathological and molecular heterogeneity of**  
518 **medulloblastoma.** *Current opinion in oncology* 2008, **20**:668-675.
- 519 12. Taylor MD, Northcott PA, Korshunov A, Remke M, Cho YJ, Clifford SC, Eberhart CG, Parsons  
520 DW, Rutkowski S, Gajjar A, et al: **Molecular subgroups of medulloblastoma: the current**  
521 **consensus.** *Acta neuropathologica* 2012, **123**:465-472.
- 522 13. DeSouza RM, Jones BR, Lowis SP, Kurian KM: **Pediatric medulloblastoma - update on**  
523 **molecular classification driving targeted therapies.** *Frontiers in oncology* 2014, **4**:176.
- 524 14. Li KK, Lau KM, Ng HK: **Signaling pathway and molecular subgroups of medulloblastoma.**  
525 *International journal of clinical and experimental pathology* 2013, **6**:1211-1222.
- 526 15. Samkari A, White JC, Packer RJ: **Medulloblastoma: Toward Biologically Based Management.**  
527 *Seminars in pediatric neurology* 2015, **22**:6-13.
- 528 16. Parsons DW, Li M, Zhang X, Jones S, Leary RJ, Lin JC-H, Boca SM, Carter H, Samayoa J,  
529 Bettegowda C, et al: **The Genetic Landscape of the Childhood Cancer Medulloblastoma.**  
530 *Science* 2011, **331**:435-439.
- 531 17. Korshunov A, Remke M, Werft W, Benner A, Ryzhova M, Witt H, Sturm D, Wittmann A,  
532 Schottler A, Felsberg J, et al: **Adult and pediatric medulloblastomas are genetically distinct**  
533 **and require different algorithms for molecular risk stratification.** *J Clin Oncol* 2010,  
534 **28**:3054-3060.
- 535 18. Smoll NR: **Relative survival of childhood and adult medulloblastomas and primitive**  
536 **neuroectodermal tumors (PNETs).** *Cancer* 2012, **118**:1313-1322.

- 537 19. Aapro MS: **Adjuvant therapy of primary breast cancer: a review of key findings from the**  
538 **7th international conference, St. Gallen, February 2001.** *The oncologist* 2001, **6**:376-385.
- 539 20. Davis TE, Carbone PP: **Drug treatment of breast cancer.** *Drugs* 1978, **16**:441-464.
- 540 21. Martin AM, Raabe E, Eberhart C, Cohen KJ: **Management of Pediatric and Adult Patients**  
541 **with Medulloblastoma.** *Current treatment options in oncology* 2014.
- 542 22. Frange P, Alapetite C, Gaboriaud G, Bours D, Zucker JM, Zerah M, Brisse H, Chevignard M,  
543 Mosseri V, Bouffet E, Doz F: **From childhood to adulthood: long-term outcome of**  
544 **medulloblastoma patients. The Institut Curie experience (1980-2000).** *Journal of neuro-*  
545 *oncology* 2009, **95**:271-279.
- 546 23. Mulhern RK, Merchant TE, Gajjar A, Reddick WE, Kun LE: **Late neurocognitive sequelae in**  
547 **survivors of brain tumours in childhood.** *The Lancet Oncology* 2004, **5**:399-408.
- 548 24. Rose SR, Danish RK, Kearney NS, Schreiber RE, Lustig RH, Burghen GA, Hudson MM: **ACTH**  
549 **deficiency in childhood cancer survivors.** *Pediatric blood & cancer* 2005, **45**:808-813.
- 550 25. Belcher SM: **Blockade of estrogen receptor signaling to improve outlook for**  
551 **medulloblastoma sufferers.** *Future oncology* 2009, **5**:751-754.
- 552 26. Belcher SM, Ma X, Le HH: **Blockade of estrogen receptor signaling inhibits growth and**  
553 **migration of medulloblastoma.** *Endocrinology* 2009, **150**:1112-1121.
- 554 27. Cookman CJ, Belcher SM: **Estrogen Receptor-beta Up-Regulates IGF1R Expression and**  
555 **Activity to Inhibit Apoptosis and Increase Growth of Medulloblastoma.** *Endocrinology* 2015,  
556 **156**:2395-2408.
- 557 28. Kirby M, Zsarnovszky A, Belcher SM: **Estrogen receptor expression in a human primitive**  
558 **neuroectodermal tumor cell line from the cerebral cortex: estrogen stimulates rapid**  
559 **ERK1/2 activation and receptor-dependent cell migration.** *Biochemical and biophysical*  
560 *research communications* 2004, **319**:753-758.
- 561 29. Levin ER: **Integration of the extranuclear and nuclear actions of estrogen.** *Mol Endocrinol*  
562 2005, **19**:1951-1959.

- 563 30. Levin ER: **Minireview: Extranuclear steroid receptors: roles in modulation of cell functions.**  
564 *Molecular endocrinology (Baltimore, Md)* 2011, **25**:377-384.
- 565 31. Murphy LC, Leygue E: **The role of estrogen receptor-beta in breast cancer.** *Seminars in*  
566 *reproductive medicine* 2012, **30**:5-13.
- 567 32. Thomas C, Gustafsson JA: **The different roles of ER subtypes in cancer biology and therapy.**  
568 *Nature reviews Cancer* 2011, **11**:597-608.
- 569 33. Mancuso M, Leonardi S, Giardullo P, Pasquali E, Borra F, Stefano ID, Prisco MG, Tanori M,  
570 Scambia G, Majo VD, et al: **The estrogen receptor beta agonist diarylpropionitrile (DPN)**  
571 **inhibits medulloblastoma development via anti-proliferative and pro-apoptotic pathways.**  
572 *Cancer letters* 2011, **308**:197-202.
- 573 34. Wilk A, Waligorska A, Waligorski P, Ochoa A, Reiss K: **Inhibition of ERbeta induces**  
574 **resistance to cisplatin by enhancing Rad51-mediated DNA repair in human**  
575 **medulloblastoma cell lines.** *PloS one* 2012, **7**:e33867.
- 576 35. Hall MD, Telma KA, Chang KE, Lee TD, Madigan JP, Lloyd JR, Goldlust IS, Hoeschele JD,  
577 Gottesman MM: **Say no to DMSO: dimethylsulfoxide inactivates cisplatin, carboplatin, and**  
578 **other platinum complexes.** *Cancer research* 2014, **74**:3913-3922.
- 579 36. Wong JK, Kennedy PR, Belcher SM: **Simplified serum- and steroid-free culture conditions**  
580 **for high-throughput viability analysis of primary cultures of cerebellar granule neurons.**  
581 *Journal of neuroscience methods* 2001, **110**:45-55.
- 582 37. O'Brien J, Wilson I, Orton T, Pognan F: **Investigation of the Alamar Blue (resazurin)**  
583 **fluorescent dye for the assessment of mammalian cell cytotoxicity.** *European journal of*  
584 *biochemistry / FEBS* 2000, **267**:5421-5426.
- 585 38. Franken NA, Rodermond HM, Stap J, Haveman J, van Bree C: **Clonogenic assay of cells in**  
586 **vitro.** *Nature protocols* 2006, **1**:2315-2319.
- 587 39. Munshi A, Hobbs M, Meyn RE: **Clonogenic cell survival assay.** *Methods in molecular medicine*  
588 2005, **110**:21-28.

- 589 40. Muthyala RS, Ju YH, Sheng S, Williams LD, Doerge DR, Katzenellenbogen BS, Helferich WG,  
590 Katzenellenbogen JA: **Equol, a natural estrogenic metabolite from soy isoflavones:**  
591 **convenient preparation and resolution of R- and S-equols and their differing binding and**  
592 **biological activity through estrogen receptors alpha and beta.** *Bioorganic & Medicinal*  
593 *Chemistry* 2004, **12**:1559-1567.
- 594 41. Patisaul HB, Jefferson W: **The pros and cons of phytoestrogens.** *Frontiers in*  
595 *neuroendocrinology* 2010, **31**:400-419.
- 596 42. Jacobsen PF, Jenkyn DJ, Papadimitriou JM: **Establishment of a human medulloblastoma cell**  
597 **line and its heterotransplantation into nude mice.** *Journal of neuropathology and experimental*  
598 *neurology* 1985, **44**:472-485.
- 599 43. Ramachandran C, Khatib Z, Petkarou A, Fort J, Fonseca HB, Melnick SJ, Escalon E: **Tamoxifen**  
600 **modulation of etoposide cytotoxicity involves inhibition of protein kinase C activity and**  
601 **insulin-like growth factor II expression in brain tumor cells.** *Journal of neuro-oncology* 2004,  
602 **67**:19-28.
- 603 44. De Braganca KC, Packer RJ: **Treatment Options for Medulloblastoma and CNS Primitive**  
604 **Neuroectodermal Tumor (PNET).** *Current treatment options in neurology* 2013, **15**:593-606.
- 605 45. DeVita VT, Young RC, Canellos GP: **Combination versus single agent chemotherapy: a**  
606 **review of the basis for selection of drug treatment of cancer.** *Cancer* 1975, **35**:98-110.
- 607 46. Muggia FM, Cortes-Funes H, Wasserman TH: **Radiotherapy and chemotherapy in combined**  
608 **clinical trials: problems and promise.** *International journal of radiation oncology, biology,*  
609 *physics* 1978, **4**:161-171.
- 610 47. Albain KS, Barlow WE, Ravdin PM, Farrar WB, Burton GV, Ketchel SJ, Cobau CD, Levine EG,  
611 Ingle JN, Pritchard KI, et al: **Adjuvant chemotherapy and timing of tamoxifen in**  
612 **postmenopausal patients with endocrine-responsive, node-positive breast cancer: a phase 3,**  
613 **open-label, randomised controlled trial.** *Lancet* 2009, **374**:2055-2063.

- 614 48. Goel S, Sharma R, Hamilton A, Beith J: **LHRH agonists for adjuvant therapy of early breast**  
615 **cancer in premenopausal women.** *The Cochrane database of systematic reviews*  
616 2009:CD004562.
- 617 49. Goldhirsch A, Coates AS, Colleoni M, Castiglione-Gertsch M, Gelber RD: **Adjuvant**  
618 **chemoendocrine therapy in postmenopausal breast cancer: cyclophosphamide,**  
619 **methotrexate, and fluorouracil dose and schedule may make a difference.** **International**  
620 **Breast Cancer Study Group.** *Journal of clinical oncology : official journal of the American*  
621 *Society of Clinical Oncology* 1998, **16**:1358-1362.
- 622 50. Lumachi F, Brunello a, Maruzzo M, Basso U, Basso SMM: **Treatment of estrogen receptor-**  
623 **positive breast cancer.** *Current medicinal chemistry* 2013, **20**:596-604.
- 624 51. Mehta RS, Barlow WE, Albain KS, Vandenberg TA, Dakhil SR, Tirumali NR, Lew DL, Hayes  
625 DF, Gralow JR, Livingston RB, Hortobagyi GN: **Combination anastrozole and fulvestrant in**  
626 **metastatic breast cancer.** *The New England journal of medicine* 2012, **367**:435-444.
- 627 52. Urbanska K, Pannizzo P, Lassak A, Gualco E, Surmacz E, Croul S, Del Valle L, Khalili K, Reiss  
628 **K: Estrogen receptor beta-mediated nuclear interaction between IRS-1 and Rad51 inhibits**  
629 **homologous recombination directed DNA repair in medulloblastoma.** *Journal of cellular*  
630 *physiology* 2009, **219**:392-401.
- 631 53. Wakeling AE, Dukes M, Bowler J: **A Potent Specific Pure Antiestrogen with Clinical**  
632 **Potential.** *Cancer research* 1991, **51**:3867-3873.
- 633 54. Wong JK, Le HH, Zsarnovszky A, Belcher SM: **Estrogens and ICI182,780 (Faslodex)**  
634 **modulate mitosis and cell death in immature cerebellar neurons via rapid activation of**  
635 **p44/p42 mitogen-activated protein kinase.** *The Journal of neuroscience : the official journal of*  
636 *the Society for Neuroscience* 2003, **23**:4984-4995.
- 637 55. Xu J, Margol A, Asgharzadeh S, Erdreich-Epstein A: **Pediatric brain tumor cell lines.** *Journal*  
638 *of cellular biochemistry* 2015, **116**:218-224.



- 639 56. Weeraratne SD, Amani V, Teider N, Pierre-Francois J, Winter D, Kye MJ, Sengupta S, Archer T,  
640 Remke M, Bai AH, et al: **Pleiotropic effects of miR-183~96~182 converge to regulate cell**  
641 **survival, proliferation and migration in medulloblastoma.** *Acta neuropathologica* 2012,  
642 **123:539-552.**
- 643
- 644
